# Supplementary material for: Stress and salivary cortisol in emergency medical dispatchers: A randomized shifts control trial
Source: PLoS One. 2017 May 15;12(5):e0177094. doi: 10.1371/journal.pone.0177094 (PMC5432068; doi:10.1371/journal.pone.0177094)
Supplement: S1 Database — 999 = missing data. (XLSX) [file pone.0177094.s004.xlsx]

## Sheet: gee
			Correspondance Numéros de tubes -->ID	id	occupation_nom	occupation_num	position_nom	position_num	date	vas_stress	type	h_t0	cortit0	cortit1	cortit2	cortit3	cortit4	cortit5	cortit6	cortit7	autre_p0	evtsuj	evtobs	age_nom	age_num	anciennete	sexe1M2F	NEOPIR_nevros	NEOPIR_extrav	NEOPIR_ouvert	NEOPIR_agreab	NEOPIR_consci	spp	spn	SPPN_q1	SPPN_q2	SPPN_q3	SPPN_q4	SPPN_q5	SPPN_q6	SPPN_q7	SPPN_q8	SPPN_q9	SPPN_q10	SPPN_q11	SPPN_q12	SPPN_q13	SPPN_q14	SPPN_q15
id	ano		25	110	paramedics	1	emergency_call	1	2014-04-15		P0	2.4	0	0	0	0	0	0	0	0	non			40-49 ans	45	plus de 5 ans	2	83	137	122	135	146	53.71	48.73	4	1	4	2	3	1	2	2	3	2	3	2	3	2	3
1	147		4	112	paramedics	1	emergency_call	1	2014-03-03	0	P1		0.68	0.37	0.39	0.48	0.58	0.52	0.44	0.66	non	non	non	20-29 ans	25	moins de 5 ans	1	94	141	132	112	137	51.5	42.68	4	1	3	1	1	3	2	1	3	2	3	1	3	2	3
2	118		10	113	paramedics	1	emergency_call	1	2014-03-18	0	P0		0.49	0.59	0	0.46	0.57	0	0	0.46	non		non	30-39 ans	35	moins de 5 ans	2	133	93	110	130	138	50.4	42.68	4	1	3	1	1	1	2	2	4	1	2	1	4	2	4
3	123		14	114	paramedics	1	emergency_call	1	2014-03-09	9	P0		0.99	1	0.82	0.69	0.4	0.63	0	0.43	non	non	oui	20-29 ans	25	moins de 5 ans	2	113	133	101	126	124	57.92	44.93	4	1	3	1	1	2	3	2	4	3	3	1	3	1	4
4	112		2	118	paramedics	1	emergency_call	1	2014-03-09	6	P0		0	0	0.4	0	0	0	0	0	oui	oui	oui	30-39 ans	35	plus de 5 ans	2						57.92	44.93
5	133		21	119	paramedics	1	emergency_call	1	2014-03-18	0	P0		0.62	0.46	0	0.4	0	0	0	0	non		oui	50-59 ans	55	plus de 5 ans	2	83	137	124	90	122	33.47	23.28	1	1	1	1	1	1	2	1	1	1	1	1	1	1	1
6	144		8	120	paramedics	1	emergency_call	1	2014-03-07	5	P0		0.6	0.58	0.54	0.45	0.44	0.49	0	0.4	oui	non	oui	20-29 ans	25	moins de 5 ans	1	111	132	125	87	102	52.44	53.71	3	2	4	1	1	2	2	3	3	2	3	1	3	2	3
7	124		3	123	paramedics	1	emergency_call	1	2014-03-01	6	P0		0.41	0.43	0.39	0.3	0.39	0.43	0.41	0.51	non	non	oui	20-29 ans	25	moins de 5 ans	1	81	145	110	88	132	43.29	50.74	4	1	3	2	2	1	1	3	2	2	2	1	2	2	3
8	120		7	124	paramedics	1	emergency_call	1	2014-03-02	1	P0		0.54	0.31	0.39	0.54	0.66	0.3	0.43	0.67	non	non	non	40-49 ans	45	moins de 5 ans	1	63	137	104	132	129	47.23	28.15	3	1	2	1	1	1	1	1	3	1	3	1	3	1	3
9	125		9	125	paramedics	1	emergency_call	1					0	0	0.46	0	0	0	0	0.41	non			30-39 ans	35	plus de 5 ans	1	69	115	100	126	139	45.22	40.12	4	1	3	2	1	1	1	2	3	1	3	1	2	2	3
10	113		15	126	paramedics	1	emergency_call	1	2014-06-04	3	P0		0	0	0	0	0	0	0	0	non	oui	oui	20-29 ans	25	plus de 5 ans	2	69	118	120	146	138	67.16	44.93	3	1	4	1	2	1	3	2	4	3	4	1	4	1	4
12	131		22	129	paramedics	1	emergency_call	1	2014-03-03	2	P1		0.43	0.35	0.31	0.25	0.29	0.23	0.33	0.26	non	non	oui	30-39 ans	35	plus de 5 ans	2	55	127	138	137	110	49.3	65.5	4	3	3	3	3	3	3	3	2	4	2	1		3	2
13	143		12	131	paramedics	1	emergency_call	1	2014-03-10	2	P0		0.63	0.51	0.75	0.75	0.78	0.87	0.84	0.55	oui	non	oui	50-59 ans	55	plus de 5 ans	1	73	116	135	112	129	49.3	54.08	4	1	2	1	1	1	1	1	3	1	4	1	2	2	3
14	114		5	133	paramedics	1	emergency_call	1	2014-04-01	0	P1		0	0	0	0	0	0	0	0	non	non	oui	30-39 ans	35	plus de 5 ans	2	73	128	76	134	138	49.3	42.68	4	1	2	1	2	1	2	3	3	3	3	1	3	2	3
15	126		18	134	paramedics	1	emergency_call	1					0.74	0.5	0.53	0.51	0.48	0.45	0.44	0.42	non			30-39 ans	35	moins de 5 ans	1	72	128	113	122	136	49.3	42.68	3	1	3	2	1	1	3	2	3	1	4	1	3	1	2
16	135		16	135	paramedics	1	emergency_call	1	2014-03-12	8	P0		0.67	0.76	0.45	0.73	0	0.41	0.57	0.74	oui	non	oui	20-29 ans	25	moins de 5 ans	1	123	91	70	143	71	55.85	50.74	4	1		2	3	2	3	2	3	2	4	1	3	2	4
17	139		23	136	paramedics	1	emergency_call	1	2014-03-03	1	P1		0.32	0.29	0.45	0.43	0.52	0.49	0.55	0.36	non	non	oui	20-29 ans	25	plus de 5 ans	2	89	122	125	125	115	49.3	42.68		1	4	2	3	1	2	1	3		3	1	3	2	3
18	134		24	140	paramedics	1	emergency_call	1	2014-03-09	1	P0		0	0.45	0	0	0.51	0.52	0.71	0.7	non		oui	40-49 ans	45	plus de 5 ans	2	86	116	132	122	120	51.5	44.93	4	1	3	1	2	1	3	2	3	1	3	1	4	1	4
19	141		19	141	paramedics	1	emergency_call	1	2014-03-17	6	P1		0.45	0.42	0.59	0.42	0.45	0.58	0	0	oui	non	oui	50-59 ans	55	plus de 5 ans	2	107	101	99	106	130	55.83	42.68	4	1	4	2	2	1	2	1	2	2	3	2	2	2	3
21	119		13	143	paramedics	1	emergency_call	1	2014-06-30	1	P1		0.48	0	0	0	0	0	0	0	oui	oui	oui	20-29 ans	25	plus de 5 ans	2	88	116	102	93	143	55.83	42.68	3	1	4	1	2	2	2	1	3	1	3	1	3	2	4
22	129		6	144	paramedics	1	emergency_call	1	2014-03-17	4	P0		0.46	0.49	0	0.41	0.56	0.53	0.53	0	non	non	oui	40-49 ans	45	plus de 5 ans	2	79	102	115	138	150	55.83	59.67	4	1	4	2	3	2	2	2	3	4	4	1	3	3	3
23	136		1	147	paramedics	1	emergency_call	1	2014-03-11	4	P0		0.4	0.44	0	0	0	0	0	0	oui	non	oui	40-49 ans	45	plus de 5 ans	2	61	139	127	120	151	48.73	53.71	4	1	3	2	2	1	2	2	2	2	3	1	3	2	3
24	140		25	110	paramedics	1	report	2	2014-04-11	0	P1		0	0	0	0	0	0	0	0	oui		oui	40-49 ans	45	plus de 5 ans	2	83	137	122	135	146	53.71	48.73	4	1	4	2	3	1	2	2	3	2	3	2	3	2	3
25	110		4	112	paramedics	1	report	2	2014-03-17	1	P0		0.83	0.56	0.52	0.54	0.4	0.43	0.48	0	oui	non	oui	20-29 ans	25	moins de 5 ans	1	94	141	132	112	137	51.5	42.68	4	1	3	1	1	3	2	1	3	2	3	1	3	2	3
31	137		10	113	paramedics	1	report	2	2014-03-26	0	P0		0.7	0.63	0.47	0.41	0	0.46	0.48	0.55	oui		oui	30-39 ans	35	moins de 5 ans	2	133	93	110	130	138	50.4	42.68	4	1	3	1	1	1	2	2	4	1	2	1	4	2	4
32	121		14	114	paramedics	1	report	2	2014-03-14	1	P1		0.4	0.44	0.47	0	0.45	0.43	0.44	0.51	non	non	oui	20-29 ans	25	moins de 5 ans	2	113	133	101	126	124	57.92	44.93	4	1	3	1	1	2	3	2	4	3	3	1	3	1	4
33	116		2	118	paramedics	1	report	2	2014-03-04	3	P0		0.55	0.35	0.32	0.5	0.44	0.36	0.48	0.34	non	non	oui	30-39 ans	35	plus de 5 ans	2						57.92	44.93
34	146		21	119	paramedics	1	report	2	2014-03-01	0	P0		0.31	0.38	0.44	0.44	0.36	0.27	0.33	0.27	non	non	oui	50-59 ans	55	plus de 5 ans	2	83	137	124	90	122	33.47	23.28	1	1	1	1	1	1	2	1	1	1	1	1	1	1	1
35	115		8	120	paramedics	1	report	2	2014-03-12	2	P2		0.64	0.44	0.4	0.66	0.5	0.53	0	0.46	oui	non	oui	20-29 ans	25	moins de 5 ans	1	111	132	125	87	102	52.44	53.71	3	2	4	1	1	2	2	3	3	2	3	1	3	2	3
36	132		3	123	paramedics	1	report	2	2014-04-10	0	P0		0.53	0.53	0	0	0	0	0	0	non			20-29 ans	25	moins de 5 ans	1	81	145	110	88	132	43.29	50.74	4	1	3	2	2	1	1	3	2	2	2	1	2	2	3
37	128		7	124	paramedics	1	report	2	2014-03-25	0	P1		0.45	0	0	0	0	0.42	0	0	non		oui	40-49 ans	45	moins de 5 ans	1	63	137	104	132	129	47.23	28.15	3	1	2	1	1	1	1	1	3	1	3	1	3	1	3
38	111		9	125	paramedics	1	report	2	2014-04-10		P0		0	0	0	0	0	0	0	0	non			30-39 ans	35	plus de 5 ans	1	69	115	100	126	139	45.22	40.12	4	1	3	2	1	1	1	2	3	1	3	1	2	2	3
40	122		15	126	paramedics	1	report	2	2014-04-18	1	P0		0.67	0.5	0	0.56	0	0	0	0	non			20-29 ans	25	plus de 5 ans	2	69	118	120	146	138	67.16	44.93	3	1	4	1	2	1	3	2	4	3	4	1	4	1	4
41	117		22	129	paramedics	1	report	2	2014-03-13	0	P2		0.56	0.61	0.43	0.45	0	0	0	0	non	non	non	30-39 ans	35	plus de 5 ans	2	55	127	138	137	110	49.3	65.5	4	3	3	3	3	3	3	3	2	4	2	1		3	2
42	138		12	131	paramedics	1	report	2	2014-03-09	0	P0		0	0	0.41	0	0	0	0	0	non		oui	50-59 ans	55	plus de 5 ans	1	73	116	135	112	129	49.3	54.08	4	1	2	1	1	1	1	1	3	1	4	1	2	2	3
43	127		5	133	paramedics	1	report	2	2014-03-02	0	P0		0.33	0.32	0.3	0.32	0.34	0.23	0.27	0.25	non	non	non	30-39 ans	35	plus de 5 ans	2	73	128	76	134	138	49.3	42.68	4	1	2	1	2	1	2	3	3	3	3	1	3	2	3
48	145		18	134	paramedics	1	report	2	2014-03-11	5	P0		0.62	0.47	0.51	0.71	0.77	0.6	0.69	0.7	oui	non	oui	30-39 ans	35	moins de 5 ans	1	72	128	113	122	136	49.3	42.68	3	1	3	2	1	1	3	2	3	1	4	1	3	1	2
49	142		16	135	paramedics	1	report	2	2014-03-21	3	P1		0.72	0.52	0.46	0	0	0	0	0	oui		oui	20-29 ans	25	moins de 5 ans	1	123	91	70	143	71	55.85	50.74	4	1		2	3	2	3	2	3	2	4	1	3	2	4
50	130		23	136	paramedics	1	report	2	2014-03-18	0	P0		0.4	0	0	0.56	0	0.47	0.7	0	non			20-29 ans	25	plus de 5 ans	2	89	122	125	125	115	49.3	42.68		1	4	2	3	1	2	1	3		3	1	3	2	3
			24	140	paramedics	1	report	2	2014-04-03	3	P0		0	0	0	0	0	0	0	0	non		oui	40-49 ans	45	plus de 5 ans	2	86	116	132	122	120	51.5	44.93	4	1	3	1	2	1	3	2	3	1	3	1	4	1	4
			19	141	paramedics	1	report	2	2014-04-04	0	P0		0.51	0	0.45	0.49	0.45	0	0.4	0	non	non	oui	50-59 ans	55	plus de 5 ans	2	107	101	99	106	130	55.83	42.68	4	1	4	2	2	1	2	1	2	2	3	2	2	2	3
			13	143	paramedics	1	report	2	2014-04-22	1	P1		0.5	0.66	0.7	0.55	0.55	0.54	0	0	non	non	oui	20-29 ans	25	plus de 5 ans	2	88	116	102	93	143	55.83	42.68	3	1	4	1	2	2	2	1	3	1	3	1	3	2	4
			6	144	paramedics	1	report	2	2014-03-24	3	P1		0	0	0	0	0	0	0	0	oui	oui	oui	40-49 ans	45	plus de 5 ans	2	79	102	115	138	150	55.83	59.67	4	1	4	2	3	2	2	2	3	4	4	1	3	3	3
			1	147	paramedics	1	report	2	2014-03-07	3	P0		1.1	0.61	0.49	0.49	0.41	0	0	0	oui	non	oui	40-49 ans	45	plus de 5 ans	2	61	139	127	120	151	48.73	53.71	4	1	3	2	2	1	2	2	2	2	3	1	3	2	3
			25	110	paramedics	1	vehicle	3	2014-04-20				0	0	0	0	0	0	0	0	non			40-49 ans	45	plus de 5 ans	2	83	137	122	135	146	53.71	48.73	4	1	4	2	3	1	2	2	3	2	3	2	3	2	3
			4	112	paramedics	1	vehicle	3	2014-03-28	1	P0		0	0	0	0	0	0	0	0	non	oui	oui	20-29 ans	25	moins de 5 ans	1	94	141	132	112	137	51.5	42.68	4	1	3	1	1	3	2	1	3	2	3	1	3	2	3
			10	113	paramedics	1	vehicle	3	2014-03-21	0	P0		0.91	0	0	0	0	0	0	0	oui	oui	oui	30-39 ans	35	moins de 5 ans	2	133	93	110	130	138	50.4	42.68	4	1	3	1	1	1	2	2	4	1	2	1	4	2	4
			14	114	paramedics	1	vehicle	3	2014-04-18	3	P0		0.65	0.44	0	0.5	0	0	0	0	non	oui		20-29 ans	25	moins de 5 ans	2	113	133	101	126	124	57.92	44.93	4	1	3	1	1	2	3	2	4	3	3	1	3	1	4
			2	118	paramedics	1	vehicle	3	2014-03-13	1	P2		0.49	0.48	0	0	0.4	0	0.46	0.4	non	non	non	30-39 ans	35	plus de 5 ans	2						57.92	44.93
			21	119	paramedics	1	vehicle	3	2014-03-03	0	P0		0.63	0.55	0.65	0.44	0.4	0.36	0.48	0.29	non	non	oui	50-59 ans	55	plus de 5 ans	2	83	137	124	90	122	33.47	23.28	1	1	1	1	1	1	2	1	1	1	1	1	1	1	1
			8	120	paramedics	1	vehicle	3	2014-03-02	2	P0		0.8	0.53	0.51	0.72	0.53	0.42	0.33	0.38	non	non	non	20-29 ans	25	moins de 5 ans	1	111	132	125	87	102	52.44	53.71	3	2	4	1	1	2	2	3	3	2	3	1	3	2	3
			3	123	paramedics	1	vehicle	3	2014-04-11	0	P0		0.54	0.42	0	0	0	0	0	0	oui	non	oui	20-29 ans	25	moins de 5 ans	1	81	145	110	88	132	43.29	50.74	4	1	3	2	2	1	1	3	2	2	2	1	2	2	3
			7	124	paramedics	1	vehicle	3	2014-03-07	0	P0		0.77	0.44	0.6	0	0.73	0.55	0.93	0.59	oui	non	oui	40-49 ans	45	moins de 5 ans	1	63	137	104	132	129	47.23	28.15	3	1	2	1	1	1	1	1	3	1	3	1	3	1	3
			9	125	paramedics	1	vehicle	3	2014-03-12	1	P0		0.74	0.69	0.6	0.55	0.57	0.45	0.55	0.4	oui	non	oui	30-39 ans	35	plus de 5 ans	1	69	115	100	126	139	45.22	40.12	4	1	3	2	1	1	1	2	3	1	3	1	2	2	3
			15	126	paramedics	1	vehicle	3	2014-04-08	1	P0		0.58	0.42	0.47	0.49	0	0	0	0.41	non	oui		20-29 ans	25	plus de 5 ans	2	69	118	120	146	138	67.16	44.93	3	1	4	1	2	1	3	2	4	3	4	1	4	1	4
			22	129	paramedics	1	vehicle	3	2014-04-22	0	P1		0.45	0	0	0.4	0	0	0	0	non	non	oui	30-39 ans	35	plus de 5 ans	2	55	127	138	137	110	49.3	65.5	4	3	3	3	3	3	3	3	2	4	2	1		3	2
			12	131	paramedics	1	vehicle	3	2014-03-14	1	P0		0.59	0.43	0.45	0.58	0.59	0	0.45	0.53	non	non	oui	50-59 ans	55	plus de 5 ans	1	73	116	135	112	129	49.3	54.08	4	1	2	1	1	1	1	1	3	1	4	1	2	2	3
			5	133	paramedics	1	vehicle	3	2014-03-18	0	P0		0.57	0.62	0.48	0	0.56	0.43	0	0.42	non		oui	30-39 ans	35	plus de 5 ans	2	73	128	76	134	138	49.3	42.68	4	1	2	1	2	1	2	3	3	3	3	1	3	2	3
			18	134	paramedics	1	vehicle	3	2014-03-01	3	P0		0.55	0.52	0.56	0.5	0.47	0.51	0.32	0.53	oui	non	oui	30-39 ans	35	moins de 5 ans	1	72	128	113	122	136	49.3	42.68	3	1	3	2	1	1	3	2	3	1	4	1	3	1	2
			16	135	paramedics	1	vehicle	3	2014-03-26	0	P2		0	0	0	0	0	0	0	0	oui		oui	20-29 ans	25	moins de 5 ans	1	123	91	70	143	71	55.85	50.74	4	1		2	3	2	3	2	3	2	4	1	3	2	4
			23	136	paramedics	1	vehicle	3	2014-04-02	0	P1		0	0	0	0	0	0	0	0	non		oui	20-29 ans	25	plus de 5 ans	2	89	122	125	125	115	49.3	42.68		1	4	2	3	1	2	1	3		3	1	3	2	3
			24	140	paramedics	1	vehicle	3	2014-03-08	1	P0		0	0	0	0	0.53	0	0		non		oui	40-49 ans	45	plus de 5 ans	2	86	116	132	122	120	51.5	44.93	4	1	3	1	2	1	3	2	3	1	3	1	4	1	4
			19	141	paramedics	1	vehicle	3	2014-03-20	0	P1		0.58	0.59	0.44	0.44	0	0.5	0	0.56	non		oui	50-59 ans	55	plus de 5 ans	2	107	101	99	106	130	55.83	42.68	4	1	4	2	2	1	2	1	2	2	3	2	2	2	3
			13	143	paramedics	1	vehicle	3	2014-03-09	0	P0		0.55	0	0	0	0	0.45	0	0	non		oui	20-29 ans	25	plus de 5 ans	2	88	116	102	93	143	55.83	42.68	3	1	4	1	2	2	2	1	3	1	3	1	3	2	4
			6	144	paramedics	1	vehicle	3	2014-03-04	5	P1		0.65	0.43	0.23	0.32	0.65	0.47	0.42	0.23	non	non	oui	40-49 ans	45	plus de 5 ans	2	79	102	115	138	150	55.83	59.67	4	1	4	2	3	2	2	2	3	4	4	1	3	3	3
			1	147	paramedics	1	vehicle	3	2014-03-24	2	P1		0	0	0	0.53	0.65	0.45	0	0	oui	oui	oui	40-49 ans	45	plus de 5 ans	2	61	139	127	120	151	48.73	53.71	4	1	3	2	2	1	2	2	2	2	3	1	3	2	3
			38	111	physician	2	physician	4	2014-04-29	3	P0		0	0	0	0	0	0	0	0	non	non	oui	40-49 ans	45	plus de 5 ans	1	90	142	119	128	146	54.8	64.8	4	3	3	2	3	1	2	3	3	2	3	1	3	3	2
			35	115	physician	2	physician	4	2014-06-12	0	P1		0	0	0	0	0	0	0	0	non	non	oui	30-39 ans	35	plus de 5 ans	1	121	158	109	109	125	64.4	53.71	4	2	4	2	3	2	4	2	3	1	4	1	4	2	3
			33	116	physician	2	physician	4	2014-03-03	1	P0		0.78	0.53	0.72	0.66	0.71	0.54	0.35	0.46	non	non	oui	50-59 ans	55	plus de 5 ans	1	106	83	74	142	126	54.08	53.71	4	2	3	2	2	1	2	2	3	2	4	1	3	3	3
			41	117	physician	2	physician	4	2014-03-20	0	P1		0	0	0	0	0	0	0	0	non		oui	30-39 ans	35	plus de 5 ans	1	66	143	98	87	152	49.3	42.08	3	1	2	1	1	1	3	2	3	2	3	1	3	2	3
			32	121	physician	2	physician	4	2014-03-02	6	P0		0.76	0.54	0.32	0.61	0.7	0.4	0.4	0.58	non	non	oui	30-39 ans	35	plus de 5 ans	1	60	110	123	110	120	47.23	58.24	4	2	2	2	3	1	2	3	3	3	3	1	2	3	3
			40	122	physician	2	physician	4	2014-03-24	0	P1		0	0	0	0	0	0	0	0	oui	non	oui	30-39 ans	35	moins de 5 ans	2	66	125	115	133	122	54.8	53.71	4	3	4	1	3	1	2	2	3	2	3	1	3	3	3
			43	127	physician	2	physician	4	2014-03-18	2	P0		0	0.41	0.5	0	0	0.5	0	0.4	non			50-59 ans	55	plus de 5 ans	1	78	97	116	128	112	51.5	42.68	4	2	3	1	2	1	2	1	2	1	3	1	3	1	3
			37	128	physician	2	physician	4	2014-04-25	7	P1		0.42	0	0.42	0.58	0.41	0.49	0.4	0	non			40-49 ans	45	plus de 5 ans	2	57	119	138	127	131	47.3	58.34	3	1	2	2	3	2	2	2	3	3	3	1	3	4	3
			50	130	physician	2	physician	4	2014-04-14	2	P0		0	0	0	0	0	0	0	0	oui	oui	oui	40-49 ans	45	plus de 5 ans	1	77	119	90	135	108	43.3	40.12	3	1	2	1	1	1	2	1	3	2	2	1	2	2	3
			36	132	physician	2	physician	4	2014-03-08	2	P0		0	0.4	0	0	0	0.4	0	0.45	non		oui	30-39 ans	35	plus de 5 ans	2	76	114	108	122	130	49.3	48.94	3	1	3	2	2	1	2	2	3	2	3	1	3	2	3
			31	137	physician	2	physician	4	2014-03-01	8	P0		0.44	0.52	0.32	0.45	0.31	0.39	0.29	0.25	non	non	oui	30-39 ans	35	plus de 5 ans	1	73	107	99	98	119	55.92	42.68	3	1	3	1	1	1	3	3	3	1	3	1	3	1	3
			42	138	physician	2	physician	4	2014-08-13	2	P0		0	0	0	0	0	0	0		non	oui	oui	40-49 ans	45	plus de 5 ans	2	75	118	140	147	141	53.71	59.67	4	2	3	2	3	2	3	3	3	2	3	1	3	3	3
			49	142	physician	2	physician	4	2014-04-15	6	P0		0	0	0	0	0	0	0	0	non	oui		50-59 ans	55	plus de 5 ans	1	45	120	140	133	148	55.92	44.3	4	2	3	1	1	1	2	2	4	1	3	1	3	2	4
			48	145	physician	2	physician	4	2014-04-18	4	P0		0.65	0	0.52	0.63	0.52	0.44	0.56	0	non	oui		30-39 ans	35	moins de 5 ans	1	82	104	120	126	97	49.3	59.67	3	2	3	2	3	1	2	3	3	2	3	1	3	2	3
			34	146	physician	2	physician	4	2014-03-10	5	P0		0.55	0.42	0	0.61	0	0.6	0	0.53	oui	non	oui	30-39 ans	35	plus de 5 ans	2	118	86	116	138	110	50.4	59.67	3	2	4	2	2	3	2	3	3	2	3	1	3	2	3
									mean	Incoming emergency call	mean		0.405	0.361364	0.294091	0.31	0.301364	0.293182	0.238636	0.298636
										Re-assessment	mean		0.446364	0.319091	0.289545	0.303636	0.212273	0.215455	0.194091	0.14
										Dispatch	mean		0.456818	0.298182	0.226818	0.248636	0.276364	0.208636	0.179091	0.225714
										control	mean			0.978824	0.465294	0.354706	0.404706	0.413529	0.304706	0.270588	0.174118	#DIV/0!
														0.304706	0.299	0.293	0.286	0.28	0.275	0.270588
														+15 min	30 minutes	45 minutes	60 minutes	75 minutes	90 minutes	120 minutes
														+15 min	+30 min	+45 min	+60 min	+75 min	+90 min	+120 min
														7am	9am	11am	1pm	3pm	5pm	7pm	9pm
										Incoming emergency call	es		0.0616541	0.0577679	0.0583927	0.0567768	0.0582509	0.0587194	0.0607898	0.0591106
										Re-assessment	es		0.0640238	0.0555016	0.0502445	0.0574207	0.0534641	0.0496891	0.0542237	0.0483401
										Dispatch	es		0.0647432	0.0558413	0.0565729	0.0562516	0.0620646	0.0503123	0.0567499	0.049887
										control	es		0.106868	0.0887521	0.109363	0.0823322	0.0859827	0.0746999	0.0601204	0.0564936
						Stress response depending on severity of life-and-death emergency call												Effects of a subsequent absolute emergency incoming call after beginning of measurements												Stress response of cortisol depending on gender
								+15 min	+30 min	+45 min	+60 min	+75 min	+90 min	+120 min						+15 min	+30 min	+45 min	+60 min	+75 min	+90 min	+120 min						+15 min	+30 min	+45 min	+60 min	+75 min	+90 min	+120 min
						mean	Absolute life-and-death emergency call	0.326667	0.289111	0.289778	0.289333	0.260444	0.214444	0.233111				mean	Subsequent life-and-death emergency call	0.307273	0.238409	0.277954	0.289333	0.260444	0.214444	0.233111				mean	Male	0.375417	0.371667	0.334167	0.32875	0.3075	0.286667	0.33125
						mean	Relative life-and-death emergency call	0.325238	0.229524	0.282381	0.207619	0.193333	0.181429	0.195				mean	No subsequent life-and-death emergency call	0.307273	0.229524	0.282381	0.207619	0.193333	0.181429	0.195				mean	Female	0.298095	0.212143	0.260714	0.225952	0.2	0.156667	0.157073
						sd	Absolute life-and-death emergency call	0.258949	0.253205	0.276492	0.286542	0.258061	0.272977	0.266542				sd	Subsequent life-and-death emergency call	0.258949	0.253205	0.276492	0.286542	0.258061	0.272977	0.266542				sd	Male	0.239673	0.233735	0.304216	0.300236	0.262699	0.301167	0.278323
						sd	Relative life-and-death emergency call	0.275565	0.267198	0.242732	0.231471	0.225994	0.25691	0.221917				sd	No subsequent life-and-death emergency call	0.275565	0.267198	0.242732	0.231471	0.225994	0.25691	0.221917				sd	Female	0.273043	0.254449	0.238485	0.249155	0.234385	0.235306	0.214526
						es	Absolute life-and-death emergency call	0.0550955	0.0538734	0.058828	0.0609664	0.0549065	0.0580801	0.0567111				es	Subsequent life-and-death emergency call	0.0550955	0.0538734	0.058828	0.0609664	0.0549065	0.0580801	0.0567111				es	Male	0.0509943	0.0497308	0.0647267	0.0638801	0.0558934	0.064078	0.0592176
						es	Relative life-and-death emergency call	0.0586309	0.0568506	0.0516452	0.0492493	0.0480839	0.0546617	0.0472165				es	No subsequent life-and-death emergency call	0.0586309	0.0568506	0.0516452	0.0492493	0.0480839	0.0546617	0.0472165				es	Female	0.0580942	0.054138	0.0507415	0.0530118	0.0498693	0.0500652	0.0456437
																																				.3075
[truncated: 12 more columns]

## Sheet: ANOVA
identifiant_number	age	seniority_years	sex	emergency_call_visual_analog_scale_of_stress	severity_of_emergency_call	emergency_call_cortisol_t0	emergency_call_cortisol_t1	emergency_call_cortisol_t2	emergency_call_cortisol_t3	emergency_call_cortisol_t4	emergency_call_cortisol_t5	emergency_call_cortisol_t6	emergency_call_cortisol_t7	emergency_call_second_absolute emergency call	reassessment_visual_analog_scale_of_stress	reassessment_severity_of_emergency_call	reassessment_cortisol_t0	reassessment_cortisol_t1	reassessment_cortisol_t2	reassessment_cortisol_t3	reassessment_cortisol_t4	reassessment_cortisol_t5	reassessment_cortisol_t6	reassessment_cortisol_t7	reassessment_autre_absolute emergency call	dispatch_visual_analog_scale_of_stress	dispatch_severity_of_emergency_call	dispatch_cortisol_t0	dispatch_cortisol_t1	dispatch_cortisol_t2	dispatch_cortisol_t3	dispatch_cortisol_t4	dispatch_cortisol_t5	dispatch_cortisol_t6	dispatch_cortisol_t7	dispatch_second_absolute emergency call	control_cortisol_t0	control_cortisol_t1	control_cortisol_t2	control_cortisol_t3	control_cortisol_t4	control_cortisol_t5	control_cortisol_t6	control_cortisol_t7
1	45	more than 5 years	female		absolute emergency call	0	0	0	0	0	0	0	0	no	0	relative emergency call	0	0	0	0	0	0	0	0	yes			0	0	0	0	0	0	0	0	no	0.71	0.46	0	0	0	0	0	0
2	25	less than 5 years	male	0	relative emergency call	0.68	0.37	0.39	0.48	0.58	0.52	0.44	0.66	no	1	absolute emergency call	0.83	0.56	0.52	0.54	0.4	0.43	0.48	0	yes	1	absolute emergency call	0	0	0	0	0	0	0	0	no	0.43	0	0.77	0	0.48	0	0	0
3	35	less than 5 years	female	0	absolute emergency call	0.49	0.59	0	0.46	0.57	0	0	0.46	no	0	absolute emergency call	0.7	0.63	0.47	0.41	0	0.46	0.48	0.55	yes	0	absolute emergency call	0.91	0	0	0	0	0	0	0	yes	0.96	0.54	0.48	0.52	0.55	0.5	0.42	0
4	25	less than 5 years	female	9	absolute emergency call	0.99	1	0.82	0.69	0.4	0.63	0	0.43	no	1	relative emergency call	0.4	0.44	0.47	0	0.45	0.43	0.44	0.51	no	3	absolute emergency call	0.65	0.44	0	0.5	0	0	0	0	no	1.35	0.88	0.52	0.5	0.83	0	0.41	0
5	35	more than 5 years	female	6	absolute emergency call	0	0	0.4	0	0	0	0	0	yes	3	absolute emergency call	0.55	0.35	0.32	0.5	0.44	0.36	0.48	0.34	no	1	relative emergency call	0.49	0.48	0	0	0.4	0	0.46	0.4	no
6	55	more than 5 years	female	0	absolute emergency call	0.62	0.46	0	0.4	0	0	0	0	no	0	absolute emergency call	0.31	0.38	0.44	0.44	0.36	0.27	0.33	0.27	no	0	absolute emergency call	0.63	0.55	0.65	0.44	0.4	0.36	0.48	0.29	no	0.52	0	0.56	0.95	0.96	0.62	0.5	0.47
7	25	less than 5 years	male	5	absolute emergency call	0.6	0.58	0.54	0.45	0.44	0.49	0	0.4	yes	2	relative emergency call	0.64	0.44	0.4	0.66	0.5	0.53	0	0.46	yes	2	absolute emergency call	0.8	0.53	0.51	0.72	0.53	0.42	0.33	0.38	no
8	25	less than 5 years	male	6	absolute emergency call	0.41	0.43	0.39	0.3	0.39	0.43	0.41	0.51	no	0	absolute emergency call	0.53	0.53	0	0	0	0	0	0	no	0	absolute emergency call	0.54	0.42	0	0	0	0	0	0	yes	1.63	1.31	0.56	0.67	0.59	0.5	0.57	0.59
9	45	less than 5 years	male	1	absolute emergency call	0.54	0.31	0.39	0.54	0.66	0.3	0.43	0.67	no	0	relative emergency call	0.45	0	0	0	0	0.42	0	0	no	0	absolute emergency call	0.77	0.44	0.6	0	0.73	0.55	0.93	0.59	yes	0.83	0.81	0	1.18	1.22	1.17	0.55	0.43
10	35	more than 5 years	male			0	0	0.46	0	0	0	0	0.41	no		absolute emergency call	0	0	0	0	0	0	0	0	no	1	absolute emergency call	0.74	0.69	0.6	0.55	0.57	0.45	0.55	0.4	yes	0	0	0	0	0	0	0	0
11	25	more than 5 years	female	3	absolute emergency call	0	0	0	0	0	0	0	0	no	1	absolute emergency call	0.67	0.5	0	0.56	0	0	0	0	no	1	absolute emergency call	0.58	0.42	0.47	0.49	0	0	0	0.41	no	0.98	0	0	0.45	0	0	0	0
12	35	more than 5 years	female	2	relative emergency call	0.43	0.35	0.31	0.25	0.29	0.23	0.33	0.26	no	0	relative emergency call	0.56	0.61	0.43	0.45	0	0	0	0	no	0	relative emergency call	0.45	0	0	0.4	0	0	0	0	no	0.83	0	0	0	0	0	0.81	0
13	55	more than 5 years	male	2	absolute emergency call	0.63	0.51	0.75	0.75	0.78	0.87	0.84	0.55	yes	0	absolute emergency call	0	0	0.41	0	0	0	0	0	no	1	absolute emergency call	0.59	0.43	0.45	0.58	0.59	0	0.45	0.53	no	0.95	0.5	0.52	0	0.4	0.42	0	0
14	35	more than 5 years	female	0	relative emergency call	0	0	0	0	0	0	0	0	no	0	absolute emergency call	0.33	0.32	0.3	0.32	0.34	0.23	0.27	0.25	no	0	absolute emergency call	0.57	0.62	0.48	0	0.56	0.43	0	0.42	no	1.06	0.44	0	0.57	0.55	0.18	0.1	0.17
15	35	less than 5 years	male			0.74	0.5	0.53	0.51	0.48	0.45	0.44	0.42	no	5	absolute emergency call	0.62	0.47	0.51	0.71	0.77	0.6	0.69	0.7	yes	3	absolute emergency call	0.55	0.52	0.56	0.5	0.47	0.51	0.32	0.53	yes	1.78	1.02	0.14	0.7	0.61	0.48	0.13	0.06
16	25	less than 5 years	male	8	absolute emergency call	0.67	0.76	0.45	0.73	0	0.41	0.57	0.74	yes	3	relative emergency call	0.72	0.52	0.46	0	0	0	0	0	yes	0	relative emergency call	0	0	0	0	0	0	0	0	yes	1.33	0.85	2.04	0.69	0.84	0.65	0.58	0.41
17	25	more than 5 years	female	1	relative emergency call	0.32	0.29	0.45	0.43	0.52	0.49	0.55	0.36	no	0	absolute emergency call	0.4	0	0	0.56	0	0.47	0.7	0	no	0	relative emergency call	0	0	0	0	0	0	0	0	no	0.65	0	0	0	0	0	0	0
18	45	more than 5 years	female	1	absolute emergency call	0	0.45	0	0	0.51	0.52	0.71	0.7	no	3	absolute emergency call	0	0	0	0	0	0	0	0	no	1	absolute emergency call	0	0	0	0	0.53	0	0		no	0.69	0.51	0.44	0	0	0.66	0.53	0.83
19	55	more than 5 years	female	6	relative emergency call	0.45	0.42	0.59	0.42	0.45	0.58	0	0	yes	0	absolute emergency call	0.51	0	0.45	0.49	0.45	0	0.4	0	no	0	relative emergency call	0.58	0.59	0.44	0.44	0	0.5	0	0.56	no	1.94	0.59	0	0.65	0	0	0	0
20	25	more than 5 years	female	1	relative emergency call	0.48	0	0	0	0	0	0	0	yes	1	relative emergency call	0.5	0.66	0.7	0.55	0.55	0.54	0	0	no	0	absolute emergency call	0.55	0	0	0	0	0.45	0	0	no
21	45	more than 5 years	female	4	absolute emergency call	0.46	0.49	0	0.41	0.56	0.53	0.53	0	no	3	relative emergency call	0	0	0	0	0	0	0	0	yes	5	relative emergency call	0.65	0.43	0.23	0.32	0.65	0.47	0.42	0.23	no
22	45	more than 5 years	female	4	absolute emergency call	0.4	0.44	0	0	0	0	0	0	yes	3	absolute emergency call	1.1	0.61	0.49	0.49	0.41	0	0	0	yes	2	relative emergency call	0	0	0	0.53	0.65	0.45	0	0	yes	0.92	0.69	0.47	0.52	0	0.42	0.9	0.43

## Sheet: help
	P0=détress vitale; le 1er pris = SMUR réflexe (type ACR)
	cortisol 0 = immédiatement après avoir raccroché puis tous les 15 min jusqu'à corti6 (=1h30 après) puis corti 7 = 30 min arès croti 6 soit H+2
	evtsuj = autoevaluation; pollution stressante extérieure pendant les deux heures
	evtobs = heteroevaluation; stress extérieure suivant un observateur externe
	P1= doit être pris en charge rapidement sans détresse vitale immédiate CCMU2
	tous on commencé à 7h00 du matin.
	le premier P0 à partir de 14:00
	si pas de P0 entre 14:00 et 16:00 --> le premier P1
